# Supplementary material for: Seismic evaluation of the Flemish Cap and Goban Spur pre-rift relationship prior to the opening of the North Atlantic, with support from plate reconstruction
Source: Copernicus journal article supplement (doi:10.5194/egusphere-2023-2524), 2023-11-28
Supplement: Supplementary file 1 [file egusphere-2023-2524-supplement.pdf]

Supplementary material

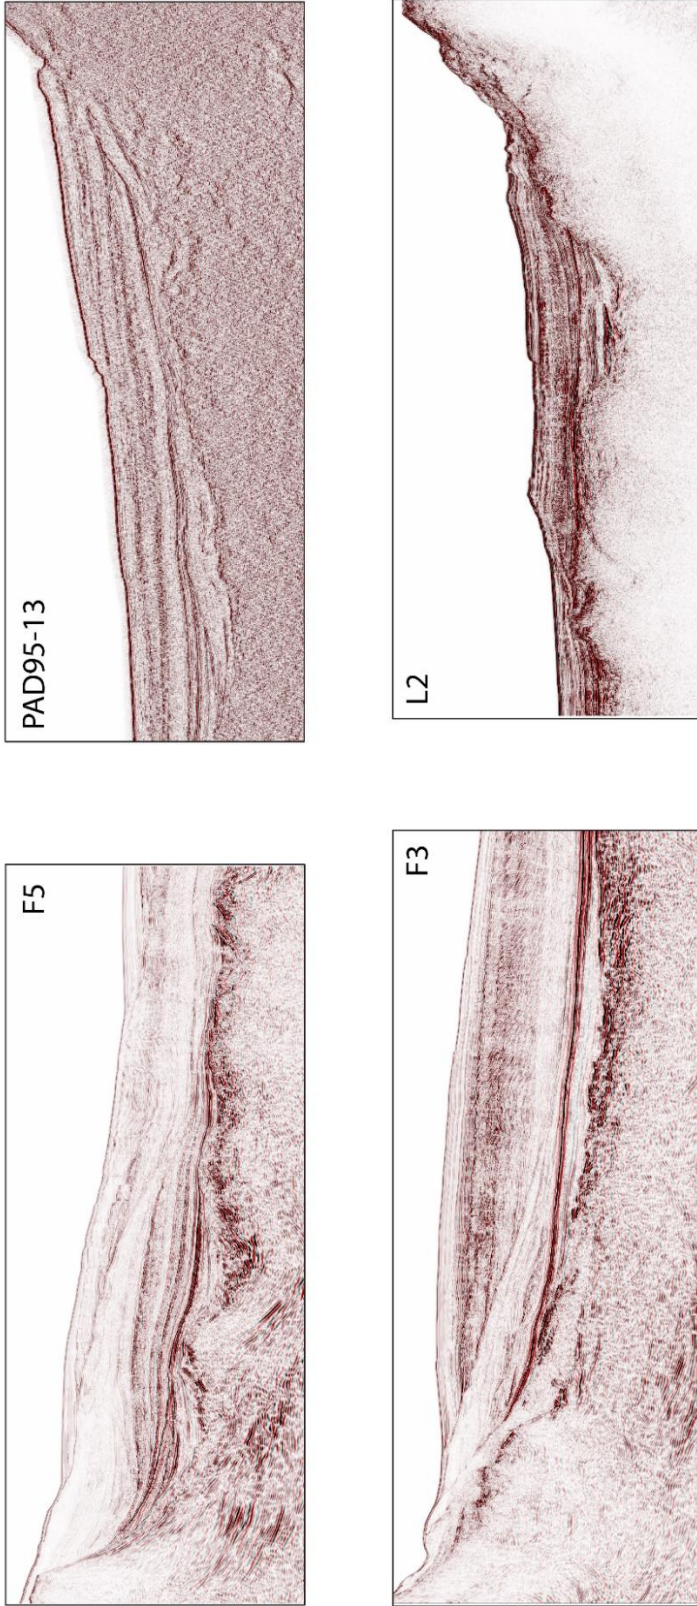

Figure S1: Enlargements of the uninterpreted seismic sections defined by the dashed blue rectangles in Figure 3.
